# Supplementary material for: Stability and efficiency of CO2 capture using linear amine polymer modified carbon nanotubes
Source: Royal Society of Chemistry journal article supplement (doi:10.1039/c7ta02576a), 2017-01-01
Supplement: c7ta02576a1.pdf [file c7ta02576a1.pdf]

Electronic Supplementary Material (ESI) for Journal of Materials Chemistry A.  
This journal is © The Royal Society of Chemistry 2017

## Electronic Supplementary Information (ESI)

### Increased efficiency of CO<sub>2</sub> capture using linear amine polymer coated carbon nanotube materials: stability under humid conditions

Z. Zhou<sup>a</sup>, C. M. Anderson,<sup>a</sup> S.K. Butler<sup>a</sup>, S. Thompson<sup>b</sup>, K.J. Whitty<sup>b</sup>, T.C. Shen<sup>c</sup>, and K.J. Stowers<sup>a†</sup>

<sup>a</sup> *Department of Chemistry and Biochemistry, Brigham Young University, Provo UT 84602, USA*

<sup>b</sup> *Department of Chemical Engineering, University of Utah, Salt Lake City UT 84112, USA*

<sup>c</sup> *Department of Physics, Utah State University, Logan UT 84322, USA*

<sup>†</sup> **Corresponding author:** K.J. Stowers, Email: [kstowers@chem.byu.edu](mailto:kstowers@chem.byu.edu), Tel: +1-801-422-0835

## Table of Contents

### S1. Flow reactor Design

**Figure S1.** Flow reactor system design and details for CO<sub>2</sub> adsorption

### S2. Materials Synthesis

**Figure S2.** The impact of cooling stage on the observed PEI loadings. PEI loadings from the TGA increased because cooled amine is easily recovered from glassware.

### S3. Materials Characterization

**Figure S3.** EDX of A) CNT control and B) CNT-40 wt%LPEI

**Figure S4.** TGA-DTG profile of TGA profile of CNT-40%LPEI.

**Figure S5.** TGA profile of CNT and CNT-LPEI with different PEI loadings.

**Figure S6.** DTG profile of CNT and CNT-LPEI with different PEI loadings.

**Table S1.** N<sub>2</sub> adsorption/desorption isotherms for surface area and pore volume of CNT, CNT-LPEI, CNT-BPEI and LPEI

### S4. CO<sub>2</sub> isotherm equation and data work up

**Table S2.** CO<sub>2</sub> adsorption net area based on CNT-LPEI mass with various PEI loadings

### S1. Flow Reactor design

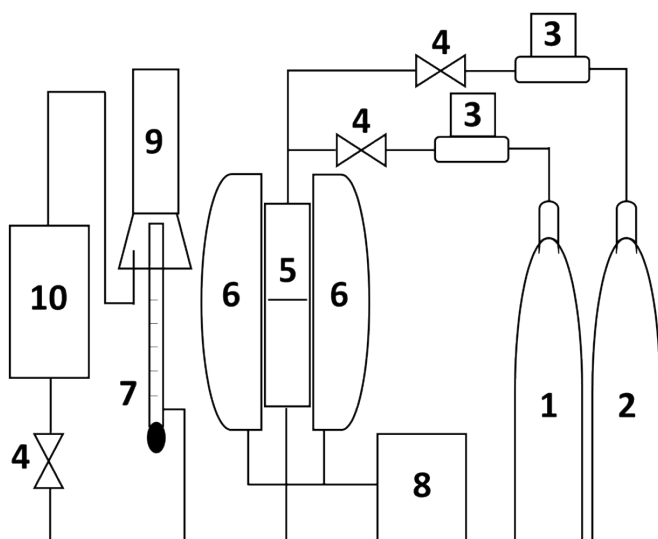

1: Nitrogen 2: Carbon dioxide 3: Mass flow controller 4: Valve  
5: Column flow reactor 6: Furnace 7: Manual bubble flow meter  
8: Temperature control 9: Exhaust 10: Mass spectrometer

**Fig. S1.** Flow reactor system design and details for CO<sub>2</sub> adsorption

### S2. Material synthesis

The solubility differences of the two polymers create the need for a different method for impregnation. BPEI can dissolve in cold ethanol in a short time (< 5 min). However, LPEI is much slower (>20 min) and must be pretreated with a sonicator before heating at 40 °C. This difference in solubility stems from the difference in molecular weight of LPEI (Mn = 2500) that is higher than BPEI (Mn = 600), making it even more difficult to dissolve in polar solvents. During the evaporating process, solvents must not evaporate too fast because PEI is very viscous and will stick to the sidewalls of the beaker and cause the inefficient amine loadings. In order to improve the loading and distribution of PEI on the CNT, the size of beaker should also be carefully chosen. Oversized beaker provides too large basal area to be covered by CNT, the rest will be covered by PEI instead and thus lower the PEI loading. In turn, the beaker with too small basal area causes an increase of height of CNT and thus decreases the homogeneity of distribution of PEI.

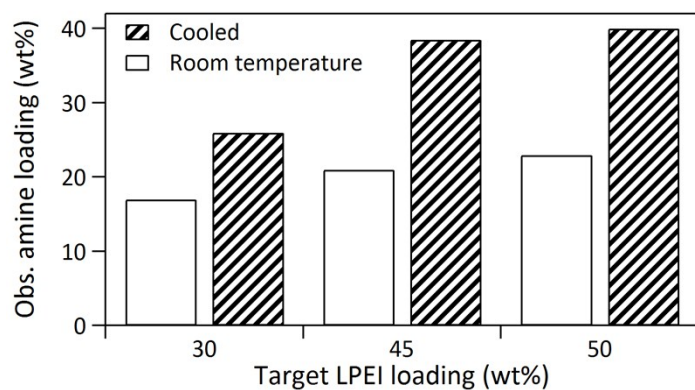

**Fig. S2** The impact of cooling stage on the observed PEI loadings. PEI loadings from the TGA increased because cooled amine is easily recovered from glassware.

### S3. Materials Characterization

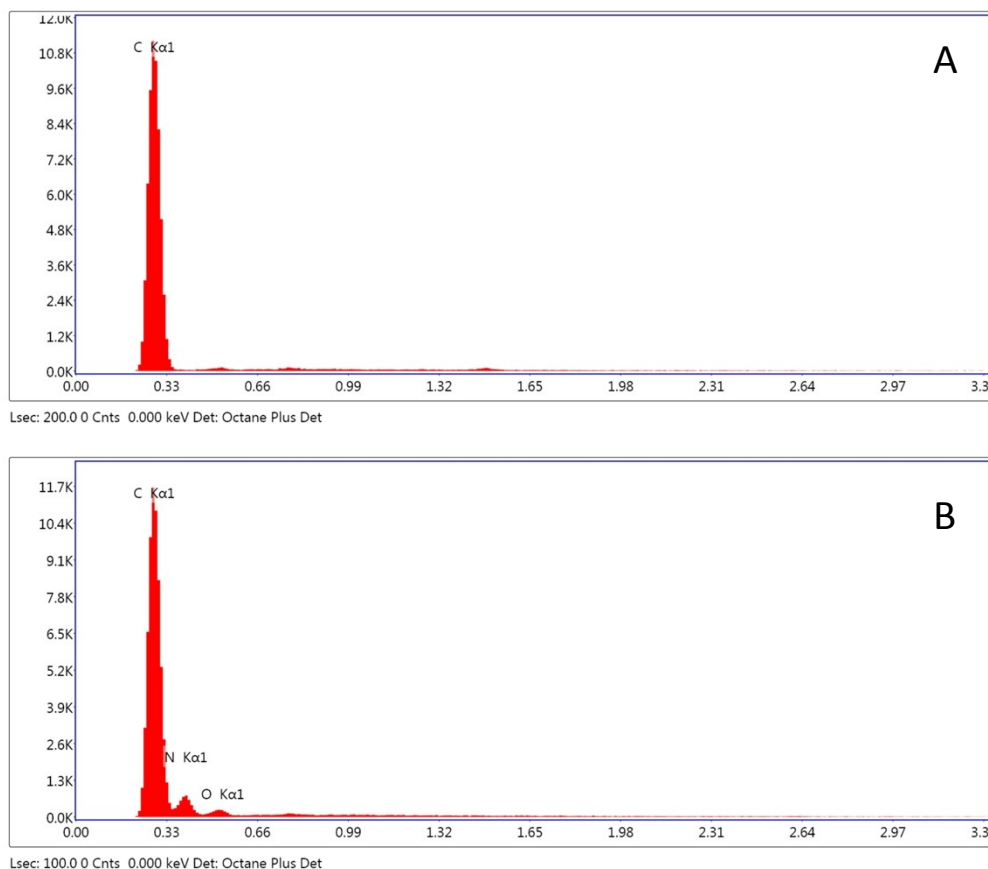

**Fig. S3.** EDX of A) CNT control and B) CNT-40 wt%LPEI

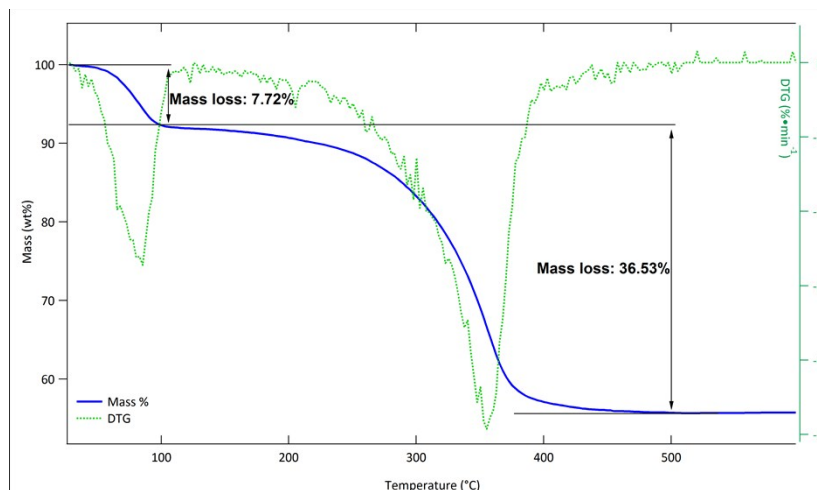

**Fig. S4.** TGA-DTG profile of TGA profile of CNT-40%LPEI.

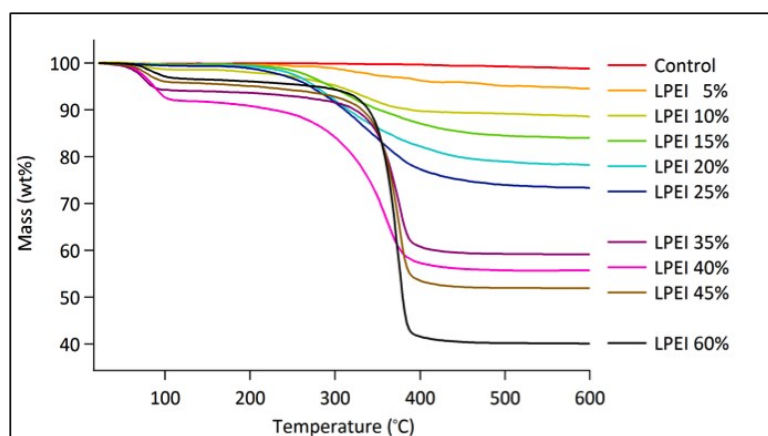

**Fig. S5.** TGA profile of CNT and CNT-LPEI with different PEI loadings.

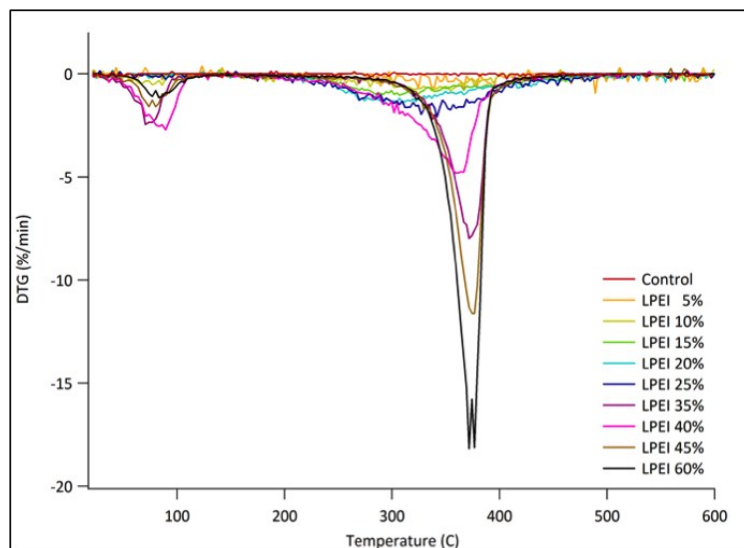

**Fig. S6.** DTG profile of CNT and CNT-LPEI with different PEI loadings.

**Table S1** N<sub>2</sub> adsorption/desorption isotherms for surface area and pore volume of CNT, CNT-LPEI, CNT-BPEI and LPEI

| Amine    | Amine Loading (%) | Surface Area (m <sup>2</sup> /g) | Pore Volume (cm <sup>3</sup> /g) |
|----------|-------------------|----------------------------------|----------------------------------|
| CNT      | 0                 | 123                              | 0.555                            |
| CNT-BPEI | 5                 | 85                               | 0.480                            |
| CNT-BPEI | 10                | 76                               | 0.442                            |
| CNT-BPEI | 20                | 62                               | 0.317                            |
| CNT-BPEI | 25                | 42                               | 0.280                            |
| CNT-BPEI | 30                | 33                               | 0.230                            |
| CNT-BPEI | 35                | 27                               | 0.209                            |
| CNT-BPEI | 40                | 14                               | 0.099                            |
| CNT-BPEI | 45                | 3                                | 0.013                            |
| CNT-LPEI | 5                 | 92                               | 0.515                            |
| CNT-LPEI | 10                | 60                               | 0.396                            |
| CNT-LPEI | 20                | 35                               | 0.298                            |
| CNT-LPEI | 25                | 34                               | 0.215                            |
| CNT-LPEI | 30                | 29                               | 0.184                            |
| CNT-LPEI | 35                | 27                               | 0.163                            |
| CNT-LPEI | 40                | 16                               | 0.146                            |
| CNT-LPEI | 45                | 5                                | 0.022                            |
| LPEI     | -                 | 0.0036                           | 0.000919                         |

#### S4. CO<sub>2</sub> isotherm equation and data work up

CO<sub>2</sub> adsorption isotherms are often reported keeping the mass of materials constant. The breakthrough time and the area are not directly correlated to the CO<sub>2</sub> adsorption capacity of CNT-LPEI material in this study without taking into account the mass. For example, without correcting for mass in equation 1, the adsorption area of CNT-46%LPEI and CNT-60%LPEI are larger than CNT-40%LPEI. Maintaining a constant packing height (1.28 cm) is important to get relative and accurate CO<sub>2</sub> adsorption capacity between materials with different densities. Since LPEI is much heavier than CNT, in order to maintain the packing height, a higher mass of CNT-LPEI should be packed in the column compared to bare CNT or CNT with low PEI loading.

It is critical for the inlet and outlet flow rates to be similar. If they are different, then equation (1) cannot be used to calculate CO<sub>2</sub> adsorption because total flow rate (Q) is not constant. The outlet flow rate measured by a manual bubble flow meter can be and is often influenced by the packing height. For example as the packing height increases above 1.28 cm, the outlet flow rate decreases, which increases the breakthrough time and can cause an overestimation of CO<sub>2</sub> adsorption capacity. In this way, a large amount of material often causes higher total CO<sub>2</sub> adsorption. Keeping the height constant, as we have done, allows more accurate CO<sub>2</sub> adsorption capacity and doesn't require a correction for density or mass transfer effects. The mass of the materials at 1.28 cm and the net area of the uptake curves are shown in Table S2. After being normalized by mass, the CO<sub>2</sub> adsorption capacity of CNT-40%LPEI will be larger than CNT-46%LPEI and CNT-60%LPEI. This trend is in agreement to what others have reported.

**Table S2** CO<sub>2</sub> adsorption net area based on CNT-LPEI mass with various PEI loadings

| Material    | Net area* | Mass of material (mg) at 1.28 cm |
|-------------|-----------|----------------------------------|
| CNT         | 0.0069    | 93.2                             |
| CNT-5%LPEI  | 0.0177    | 123.2                            |
| CNT-10%LPEI | 0.0260    | 131.3                            |
| CNT-15%LPEI | 0.0620    | 211.2                            |
| CNT-20%LPEI | 0.0787    | 205.1                            |
| CNT-25%LPEI | 0.2144    | 226.1                            |
| CNT-35%LPEI | 0.1298    | 168                              |
| CNT-40%LPEI | 0.2466    | 229.7                            |
| CNT-45%LPEI | 0.3412    | 394                              |
| CNT-60%LPEI | 0.4076    | 478.4                            |

\* The area is calculated by  $\int_0^t \frac{c_i - c_e}{1 - c_e} dt$  according to equation (1) and normalized by a control using only the glass reactor tube.
